# Supplementary material
Source: publisher figshare collection journal article supplement (https://tandf.figshare.com/ndownloader/files/31349876)
Supplement: Supplementary file 1 [file 31349876]

**Appendix B: Element list**

| … insight into own possibilities. |
| --- |
| … insight into effects of own diagnosis. |
| … insight into own restrictions. |
| … insight into effects of own impairment. |
| … make use of own possibilities/options. |
| … setting goals in life. |
| … fulfill own goals. |
| … knowing what is important in life. |
| ...establish your own life. |
| … make choices based on own abilities. |
| … processing the condition. |
| … acceptance of the condition. |
| … know when help is needed. |
| … know where to find help. |
| … ask for help. |
| … control help. |
| … knowing own limitations. |
| ... communicating own limitations. |
| … deal with throw-backs. |
| … trust own body. |
| … trust own choices. |
| … trust own abilities. |
